# Supplementary material for: A RIPK3-independent role of MLKL in suppressing parthanatos promotes immune evasion in hepatocellular carcinoma
Source: PubMed Central journal article supplement (PMC9845215; doi:10.1038/s41421-022-00504-0), 2023-01-17
Supplement: 41421_2022_504_MOESM1_ESM.pdf [file 41421_2022_504_MOESM1_ESM.pdf]

## Supplementary Information

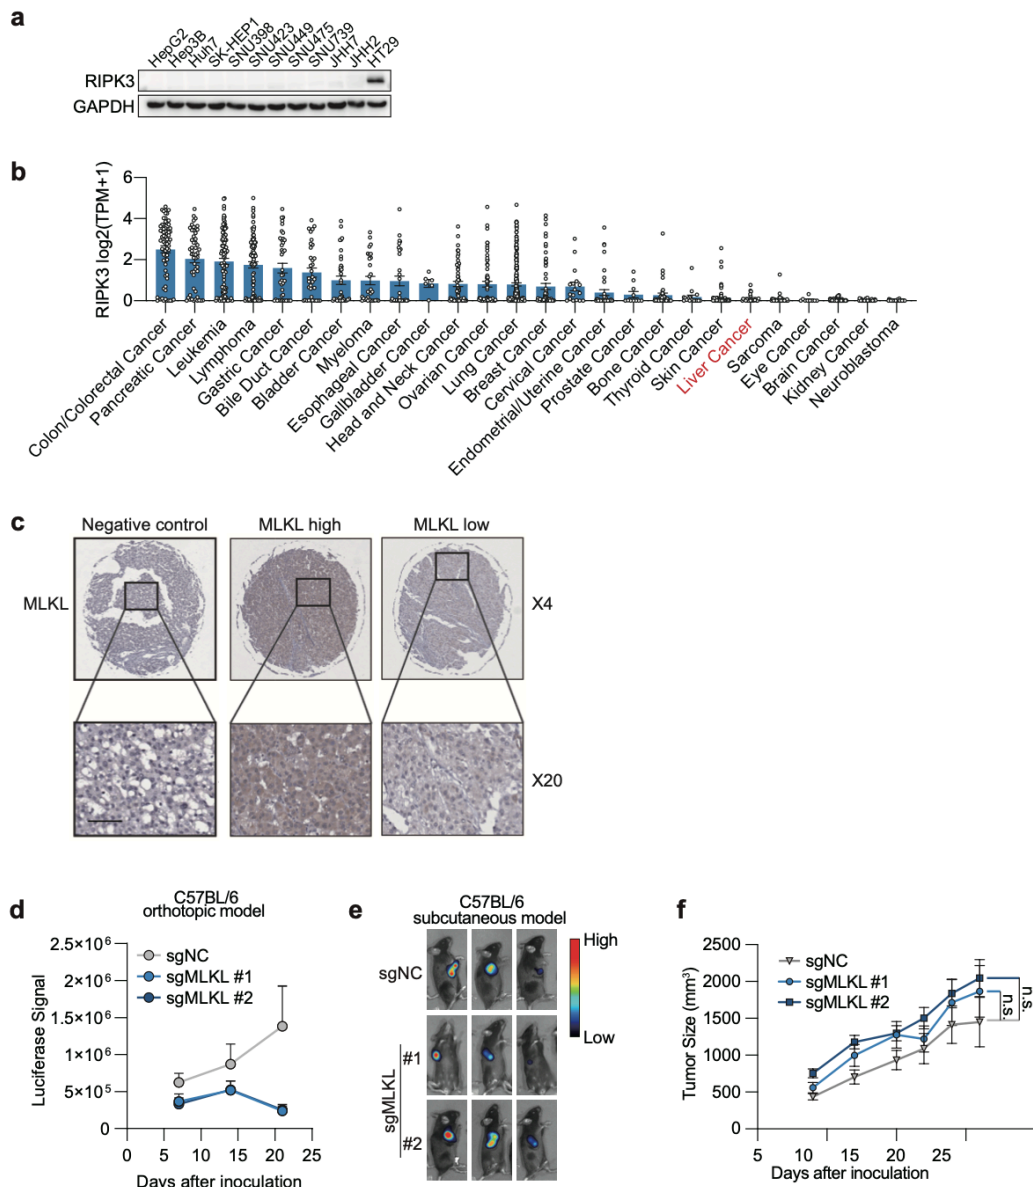

**Supplementary Fig. S1 MLKL deficiency impairs orthotopic growth of HCC tumors. (a)** RIPK3 protein level in a panel of HCC cell lines. Colon cancer cell line HT29 was used as a positive control. **(b)** RIPK3 expression in different types of cancer cells. Data were from CCLE. **(c)** Typical pictures of stained MLKL signal in HCC tissues. MLKL was stained using immunohistochemical analysis. Scale bar, 50  $\mu$ m. **(d)** Orthotopic tumor growth of MLKL-knockout and control Hepa1-6-luc cells described in Fig. 1g. Shown were quantification of luminescent signals. **(e)** Subcutaneous tumor growth of MLKL-knockout and control Hepa 1-6-luc tumors. Tumor growth was monitored by whole animal imaging. Shown were representative luminescent images. **(f)** Subcutaneous tumor growth curves of MLKL-knockout and control Hepa

1-6 tumors. Tumor growth was monitored by measuring tumor volume ( $n = 10$ ). Data are represented as mean  $\pm$  SEM. Two-tailed Student's  $t$  test was used for statistical analysis. ns, not significant; \*  $p < 0.05$ , \*\*  $p < 0.01$ , \*\*\*  $p < 0.001$ .

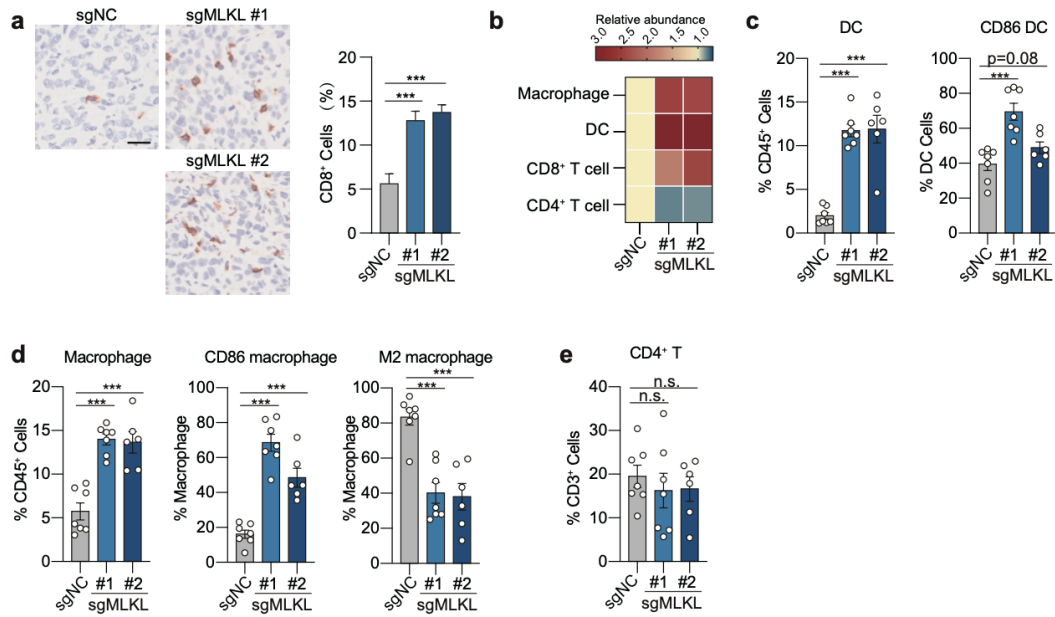

**Supplementary Fig. S2 MLKL deficiency activates anti-tumor immunity in HCC tumors. (a)** CD8 staining using immunohistochemistry analysis. MLKL-knockout Hepa1-6-luc and control cells were orthotopically implanted in C57BL/6 mice. Tumor tissues were collected for analysis. Left, representative images, scale bar, 25  $\mu$ m. Right, quantification of CD8<sup>+</sup> cells. **(b)** Heatmap of relative abundance of macrophage, DC, CD8<sup>+</sup> T and CD4<sup>+</sup> T cells. MLKL-knockout Hepa1-6 and control cells were orthotopically implanted in C57BL/6 mice and tumor infiltrating immune cells were assessed by flow cytometry analysis. The percentage of immune cells were normalized based on control tumors. **(c)** Percentage of DC cells in immune cells (left) and CD86<sup>+</sup> DC cells in DC cells (right). Tumor infiltrating immune cells were analyzed as (b). **(d)** Percentage of macrophage cells in immune cells (left), CD86<sup>+</sup> M1 macrophage cells in macrophage cells (middle) and M2 macrophage cells in macrophage cells (right). Tumor infiltrating immune cells were analyzed as (b). **(e)** Percentage of CD4<sup>+</sup> T cells in T cells. Tumor infiltrating immune cells were analyzed as (b). Data are represented as mean  $\pm$  SEM. Two-tailed Student's t test was used for statistical analysis. ns, not significant; \*  $p < 0.05$ , \*\*  $p < 0.01$ , \*\*\*  $p < 0.001$ .



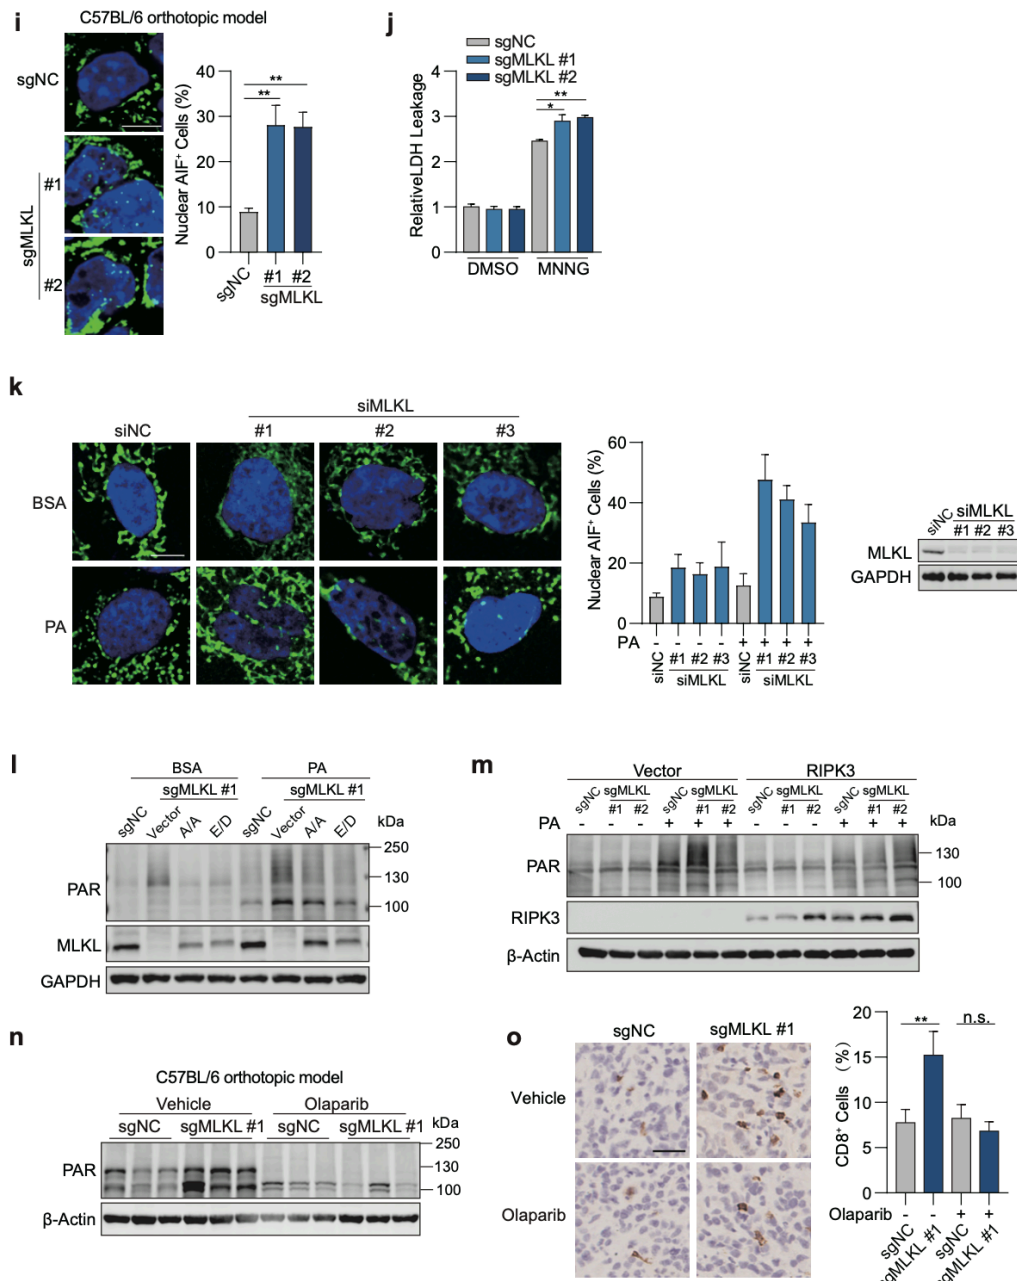

**Supplementary Fig. S3 MLKL deficiency enhances metabolic stress-induced parthanatos. (a)** Cell death induced by PA. MLKL-knockout and control Hepa1-6 cells were treated with 0.2 mM PA for indicated time (left) or at indicated concentration for 24 h (right). Cell death was measured by LDH leakage. **(b)** Dendritic cells activation described in Figure 3d. CD86 expression of BMDCs was analyzed using flow cytometry analysis. **(c)** Co-culture assay of CD8<sup>+</sup> T cells activation. MLKL-knockout and control cells were treated with or without PA (0.2 mM, 24 h) and supernatant was collected as conditioned medium. CD8<sup>+</sup> T cells isolated from the spleen of C57BL/6 mice were treated with conditioned medium for 72 h. CD44, Granzyme B and IFN $\gamma$  expression was analyzed

through flow cytometry analysis. **(d)** Cell death analysis. MLKL-knockout and control Hepa1-6 cells were pre-treated with apoptosis inhibitor z-VAD-FMK (50  $\mu$ M), necroptosis inhibitor Nec-1 (20  $\mu$ M) or ferroptosis inhibitor Fer-1 (10  $\mu$ M) respectively for 2 h, and then exposed to PA for 24 h. **(e)** Mitochondrial ROS production. MLKL-knockout and control Hepa1-6 cells were treated with or without PA for 12 h. Mitochondrial ROS was monitored by MitoSox staining. Left, representative images, scale bar, 10  $\mu$ m. Right, quantification of fluorescence intensity. **(f)** Accumulation of PAR polymer. MLKL-knockout and control Hepa1-6 cells were treated with 0.2 mM PA for indicated time (left) or at indicated concentration for 20 h (right) and then analyzed by immunoblotting. **(g)** Accumulation of PAR polymer. MLKL-knockout Hepa1-6 cells were treated with 0.2 mM PA and/or Olaparib at indicated concentrations for 20 h. **(h)** PAR polymer accumulation of orthotopic tumors. MLKL-knockout and control Hepa1-6 orthotopic tumors described in Fig. 1g were subjected to immunoblotting analysis. **(i)** AIF staining of tumors in (h). AIF was stained using immunofluorescence. Left, representative images, scale bar, 10  $\mu$ m. Right, quantification of nuclear AIF positive (AIF<sup>+</sup>) cells. **(j)** Cell death induced by MNNG. MLKL-knockout and control Hepa 1-6 cells were treated with MNNG (1 mM, 24 h). Cell death was measured by LDH leakage. **(k)** AIF staining. SK-HEP1 cells were transfected with indicated siRNAs for 48 h and then exposed to PA (0.4 mM, 20 h). AIF was stained using immunofluorescence. Left, representative images, scale bar, 10  $\mu$ m. Middle, quantification of nuclear AIF positive (AIF<sup>+</sup>) cells. Right, MLKL knockdown efficiency assessed by immunoblotting analysis. **(l)** Accumulation of PAR polymer. MLKL-knockout Hepa1-6 cells were transfected with empty vector, pcDNA3.1-MLKL<sup>A/A</sup> or pcDNA3.1-MLKL<sup>E/D</sup> for 24 h followed by PA treatment (0.2 mM, 20 h) and then analyzed by immunoblotting. **(m)** Accumulation of PAR polymer. MLKL-knockout and control Hepa1-6 cells were transfected with empty vector or pcDNA3.1-hRIPK3-Flag for 24 h followed by PA treatment (0.2 mM, 20 h) and then analyzed by immunoblotting. **(n)** PAR polymer accumulation in orthotopic tumors. MLKL-knockout and control Hepa1-6 orthotopic tumors described in Fig. 3h were subjected to immunoblotting analysis. **(o)** CD8 staining in orthotopic tumors. MLKL-knockout and control Hepa1-6 orthotopic tumors described in Fig. 3h were subjected to immunohistochemistry analysis of CD8. Left, representative images, scale bar, 25  $\mu$ m. Right, quantification of CD8<sup>+</sup> T cells. Data are represented as mean  $\pm$  SEM. Statistical analyses were performed using two-tailed Student's t

test. ns, not significant. \*  $p < 0.05$ , \*\*  $p < 0.01$ , \*\*\*  $p < 0.001$ .

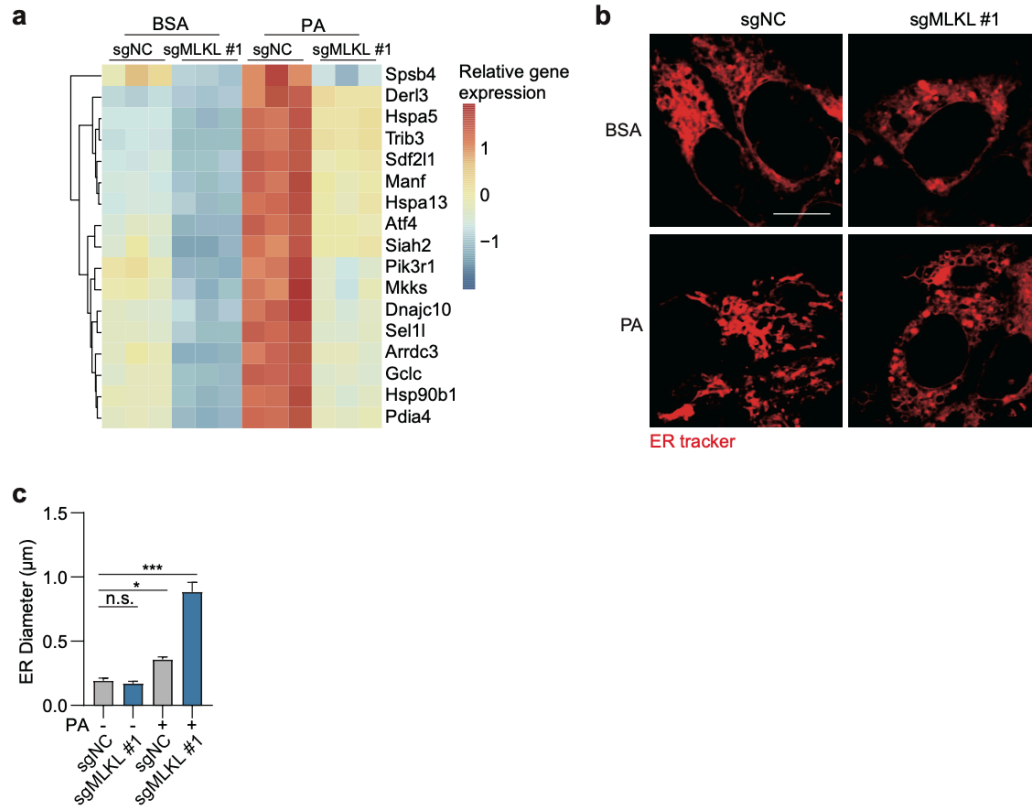

**Supplementary Fig. S4 MLKL deficiency leads to ER dysfunction in HCC cells.** (a) Heatmap of mRNA expression of ER relative genes in cells described in Fig. 4a. (b) Morphological changes of ER. MLKL-knockout and control Hepa1-6 cells were treated with or without PA (0.2 mM, 12 h). ER were stained with ER tracker. Shown were representative fluorescent images, scale bar, 10  $\mu\text{m}$ . (c) Quantification of ER diameter described in Fig. 4d. All data represent means of indicated technical replicates; error bar represent SEM. Statistical analyses were performed using two-tailed Student's t test. ns, not significant. \*  $p < 0.05$ , \*\*\*  $p < 0.001$ .



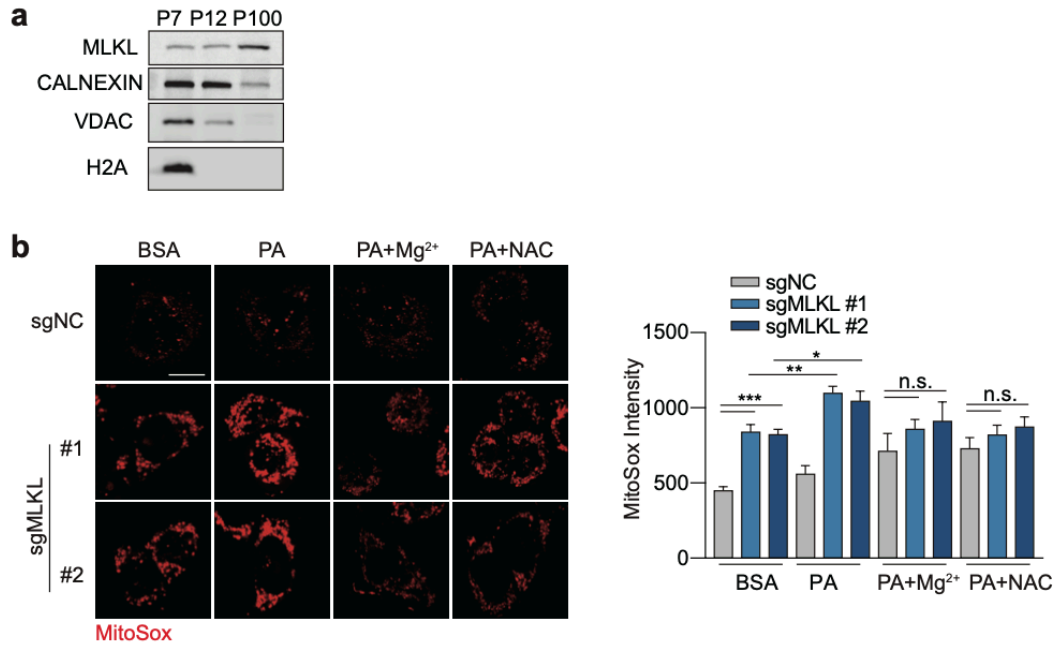

**Supplementary Fig. S5 MLKL deficiency disrupts Mg<sup>2+</sup> homeostasis in the ER. (a)** Subcellular localization of MLKL in HCC cells. ER was isolated from Hepa 1-6 cells and sequential fractions were analyzed by immunoblotting. Calnexin, an ER maker; VDAC, a mitochondrial marker. H2A, a nuclear marker. **(b)** Mitochondrial ROS production. MLKL-knockout and control Hepa1-6 cells were pretreated with Mg<sup>2+</sup> (MgCl<sub>2</sub>, 10 mM) or NAC (2 mM) for 1 h before challenged with 0.2 mM PA for 12 h. Mitochondrial ROS was monitored by MitoSox staining. Left, representative images, scale bar, 10  $\mu$ m. Right, quantification of fluorescence intensity. All data represent means of indicated technical replicates; error bar represent SEM. Statistical analyses were performed using two-tailed Student's t test. ns, not significant. \*  $p < 0.05$ , \*\*  $p < 0.01$ , \*\*\*  $p < 0.001$ .
